# Supplementary material
Source: HighWire-hosted journal article supplement (https://erj.ersjournals.com/content/58/1/2002723)
Supplement: inline-supplementary-material-1 [file inline-supplementary-material-1.pdf]

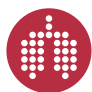

# Clinical characteristics and 3-month outcomes in cancer patients with incidental *versus* clinically suspected and confirmed pulmonary embolism

Marisa Peris<sup>1,2</sup>, Juan J. López-Núñez<sup>3,4</sup>, Ana Maestre<sup>5</sup>, David Jimenez<sup>6</sup>, Alfonso Muriel<sup>7</sup>, Behnood Bikdeli<sup>8,9,10</sup>, Ido Weinberg<sup>11</sup>, Cihan Ay<sup>12</sup>, Lucia Mazzolai<sup>13</sup>, Alicia Lorenzo<sup>14</sup>, Manuel Monreal<sup>3,4</sup> and the RIETE Investigators<sup>15</sup>

<sup>1</sup>Dept of Medicine, Universidad Cardenal Herrera CEU, CEU Universities, Castellón, Spain. <sup>2</sup>Dept of Internal Medicine, Consorcio Hospitalario Provincial de Castellón, Castellón, Spain. <sup>3</sup>Dept of Internal Medicine, Hospital Germans Trias i Pujol, Badalona, Spain. <sup>4</sup>Dept of Medicine, Universidad Autónoma de Barcelona, Barcelona, Spain. <sup>5</sup>Dept of Internal Medicine, Hospital Universitario de Vinalopó, Alicante, Spain. <sup>6</sup>Respiratory Dept, Ramón y Cajal Hospital and Instituto Ramón y Cajal de Investigación Sanitaria IRYCIS, Madrid, Spain. <sup>7</sup>Biostatistics Dept, Ramón y Cajal Hospital and Instituto Ramón y Cajal de Investigación Sanitaria IRYCIS, CIBERESP, Madrid, Spain. <sup>8</sup>Cardiovascular Division, Brigham and Women's Hospital, Harvard Medical School, Boston, MA, USA. <sup>9</sup>Yale/YNHH Center for Outcomes Research and Evaluation (CORE), New Haven, CT, USA. <sup>10</sup>Cardiovascular Research Foundation (CRF), New York, NY, USA. <sup>11</sup>Harvard Medical School, AMS Massachusetts General Hospital, Boston, MA, USA. <sup>12</sup>Dept of Medicine I, Clinical Division of Haematology and Haemostaseology, Medical University of Vienna, Vienna, Austria. <sup>13</sup>Dept of Angiology, Centre Hospitalier Universitaire Vaudois (CHUV), Lausanne, Switzerland. <sup>14</sup>Dept of Internal Medicine, Hospital Universitario La Paz, Madrid, Spain. <sup>15</sup>A full list of the RIETE investigators is given in the acknowledgements section.

Corresponding author: Juan J. López-Núñez (jjlopez.germanstrias@gencat.cat)

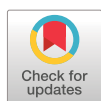

Shareable abstract (@ERSpublications)

In cancer patients with incidental pulmonary embolism the risk of venous thromboembolism recurrences or major bleeding are similar, with a lower mortality <https://bit.ly/36AvqSy>

**Cite this article as:** Peris M, López-Núñez JJ, Maestre A, *et al.* Clinical characteristics and 3-month outcomes in cancer patients with incidental *versus* clinically suspected and confirmed pulmonary embolism. *Eur Respir J* 2021; 58: 2002723 [DOI: 10.1183/13993003.02723-2020].

This single-page version can be shared freely online.

Copyright ©ERS 2021

This article has an editorial commentary: <https://doi.org/10.1183/13993003.04630-2020>

Received: 10 July 2020  
Accepted: 30 Nov 2020

## Abstract

**Background** Current guidelines suggest treating cancer patients with incidental pulmonary embolism (PE) similarly to those with clinically suspected and confirmed PE. However, the natural history of these presentations has not been thoroughly compared.

**Methods** We used the data from the RIETE (Registro Informatizado de Enfermedad TromboEmbólica) registry to compare the 3-month outcomes in patients with active cancer and incidental PE *versus* those with clinically suspected and confirmed PE. The primary outcome was 90-day all-cause mortality. Secondary outcomes were PE-related mortality, symptomatic PE recurrences and major bleeding.

**Results** From July 2012 to January 2019, 946 cancer patients with incidental asymptomatic PE and 2274 with clinically suspected and confirmed PE were enrolled. Most patients (95% *versus* 90%) received low-molecular-weight heparin therapy. During the first 90 days, 598 patients died, including 42 from PE. Patients with incidental PE had a lower all-cause mortality rate than those with suspected and confirmed PE (11% *versus* 22%; OR 0.43, 95% CI 0.34–0.54). Results were consistent for PE-related mortality (0.3% *versus* 1.7%; OR 0.18, 95% CI 0.06–0.59). Multivariable analysis confirmed that patients with incidental PE were at lower risk of death (adjusted OR 0.43, 95% CI 0.34–0.56). Overall, 29 (0.9%) patients developed symptomatic PE recurrences, and 122 (3.8%) had major bleeding. There were no significant differences in PE recurrences (OR 0.62, 95% CI 0.25–1.54) or major bleeding (OR 0.78, 95% CI 0.51–1.18).

**Conclusions** Cancer patients with incidental PE had a lower mortality rate than those with clinically suspected and confirmed PE. Further studies are required to validate these findings, and to explore optimal management strategies in these patients.
